# Supplementary material for: Side-Chain Labeling Strategy for Forming Self-Sorted Columnar Liquid Crystals from Binary Discotic Systems
Source: MDPI journal article supplement (doi:10.3390/cryst13101473), 2023-10-10
Supplement: s1 [file s1]

## **Supporting Information**

### **Side-Chain Labeling Strategy for Forming Self-Sorted Columnar Liquid Crystals from Binary Discotic Systems**

Tsuneaki Sakurai <sup>1,\*</sup>, Kenichi Kato <sup>2</sup> and Masaki Shimizu <sup>1</sup>

<sup>1</sup> *Faculty of Molecular Chemistry and Engineering, Kyoto Institute of Technology,  
Hashikami-cho, Matsugasaki, Sakyo-ku, Kyoto 606-8585, Japan*

<sup>2</sup> *RIKEN SPring-8 Center, 1-1-1 Kouto, Sayo-cho, Sayo-gun 679-5148, Japan*

\*Correspondence and requests for materials should be addressed to T.S.  
(sakurai@kit.ac.jp).

## Supporting Figures

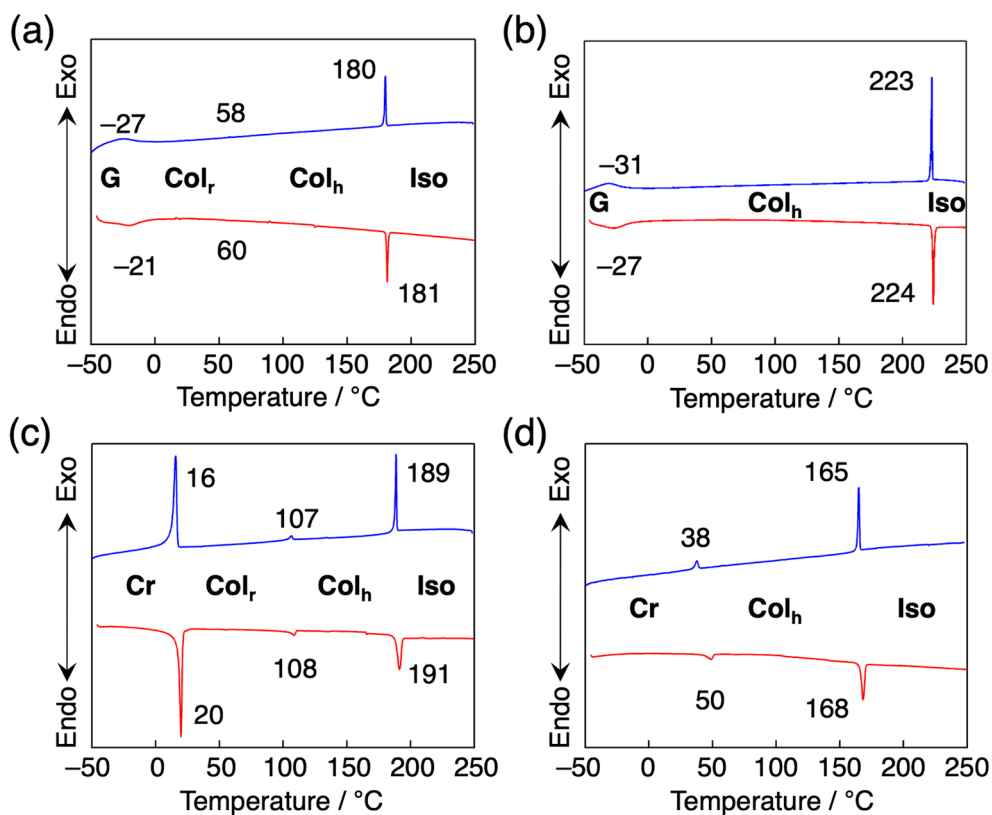

**Figure S1.** DSC traces of (a)  $\text{H}_2\text{Pc}$ , (b)  $\text{PDI}_{\text{C12/C12}}$ , (c)  $\text{PDI}_{\text{C12/TEG}}$ , and (d)  $\text{PDI}_{\text{TEG/TEG}}$  on 2nd heating/cooling cycle at 10 K/min. The phase notations; G: Glassy phase,  $\text{Col}_r$ : rectangular columnar mesophase,  $\text{Col}_h$ : hexagonal columnar mesophase, Iso: isotropic liquid phase, Cr: crystalline phase.

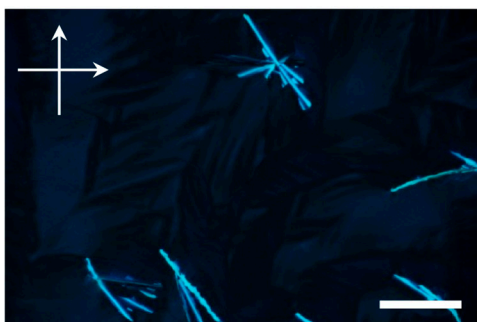

**Figure S2.** Crossed polarized microscopy images of  $\text{H}_2\text{Pc}$  in glass sandwich cell without any treatment. The image was taken at 50 °C after cooling from their isotropic melt at 10 K/min. Scale bar represent 200  $\mu\text{m}$ . This image indicates that rapid cooling process interferes the perfect homeotropic alignment.

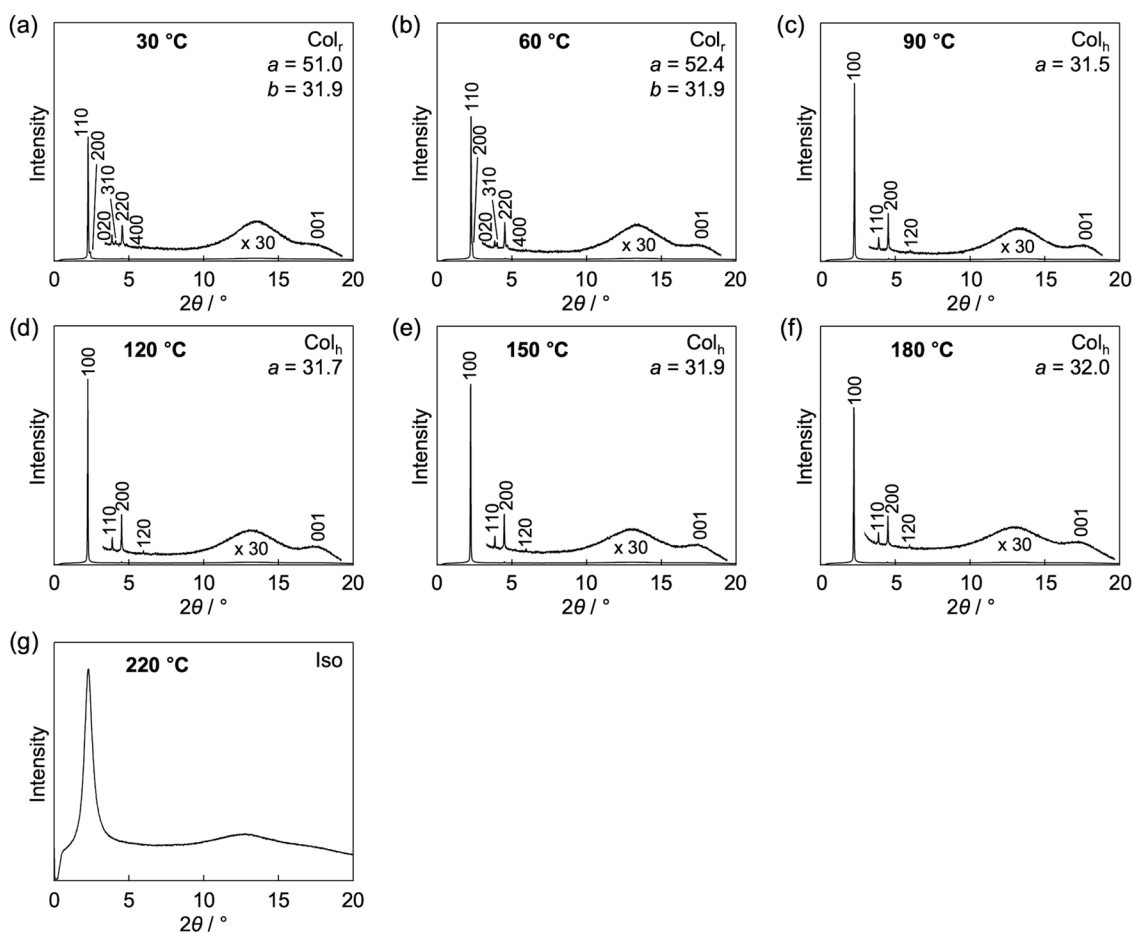

**Figure S3.** Variable-temperature XRD patterns of  $\text{H}_2\text{Pc}$  at (a) 30 °C, (b) 60 °C, (c) 90 °C, (d) 120 °C, (e) 150 °C, (f) 180 °C, and (g) 220 °C on cooling. The phase assignment and cell parameters are represented at the upper right corner of each pattern.

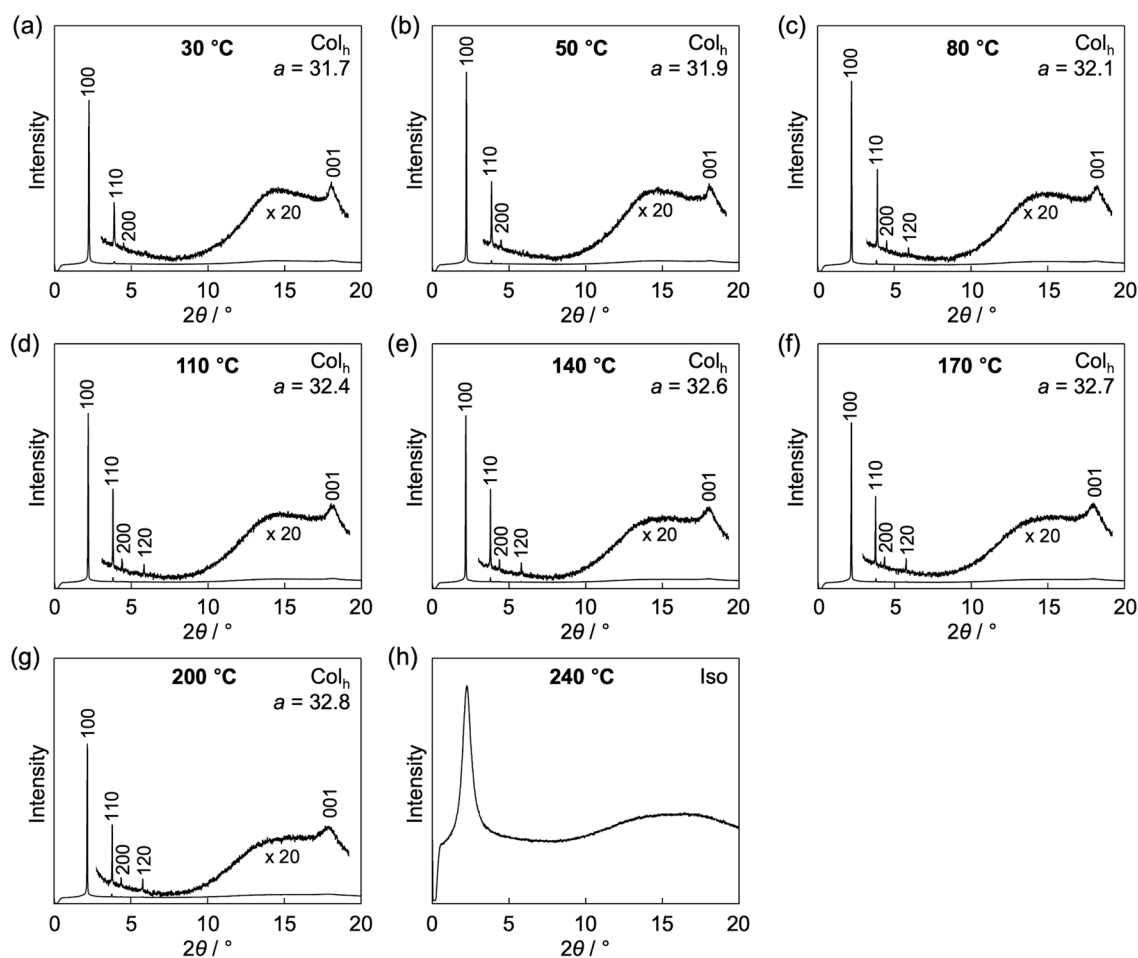

**Figure S4.** Variable-temperature XRD patterns of 1:1 molar ratio mixture of  $\text{H}_2\text{Pc}/\text{PDI}_{\text{C12}}/\text{C12}$  at (a) 30 °C, (b) 50 °C, (c) 80 °C, (d) 110 °C, (e) 140 °C, (f) 170 °C, (g) 200 °C, and (h) 240 °C on cooling. The phase assignment and cell parameters are represented at the upper right corner of each pattern.

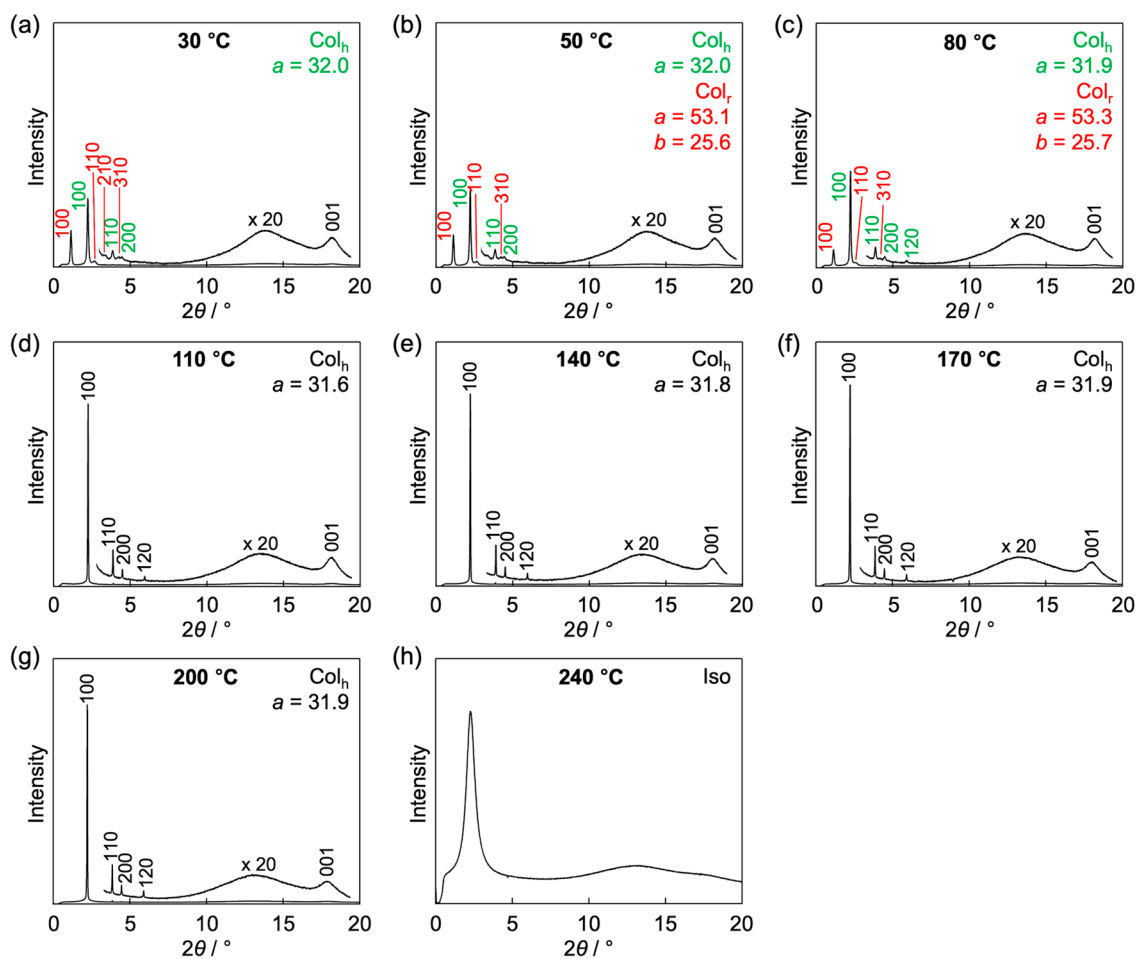

**Figure S5.** Variable-temperature XRD patterns of 1:1 molar ratio mixture of  $\text{H}_2\text{Pc}/\text{PDI}_{\text{C12}}/\text{TEG}$  at (a) 30 °C, (b) 50 °C, (c) 80 °C, (d) 110 °C, (e) 140 °C, (f) 170 °C, (g) 200 °C, and (h) 240 °C on cooling. The phase assignment and cell parameters are represented at the upper right corner of each pattern.

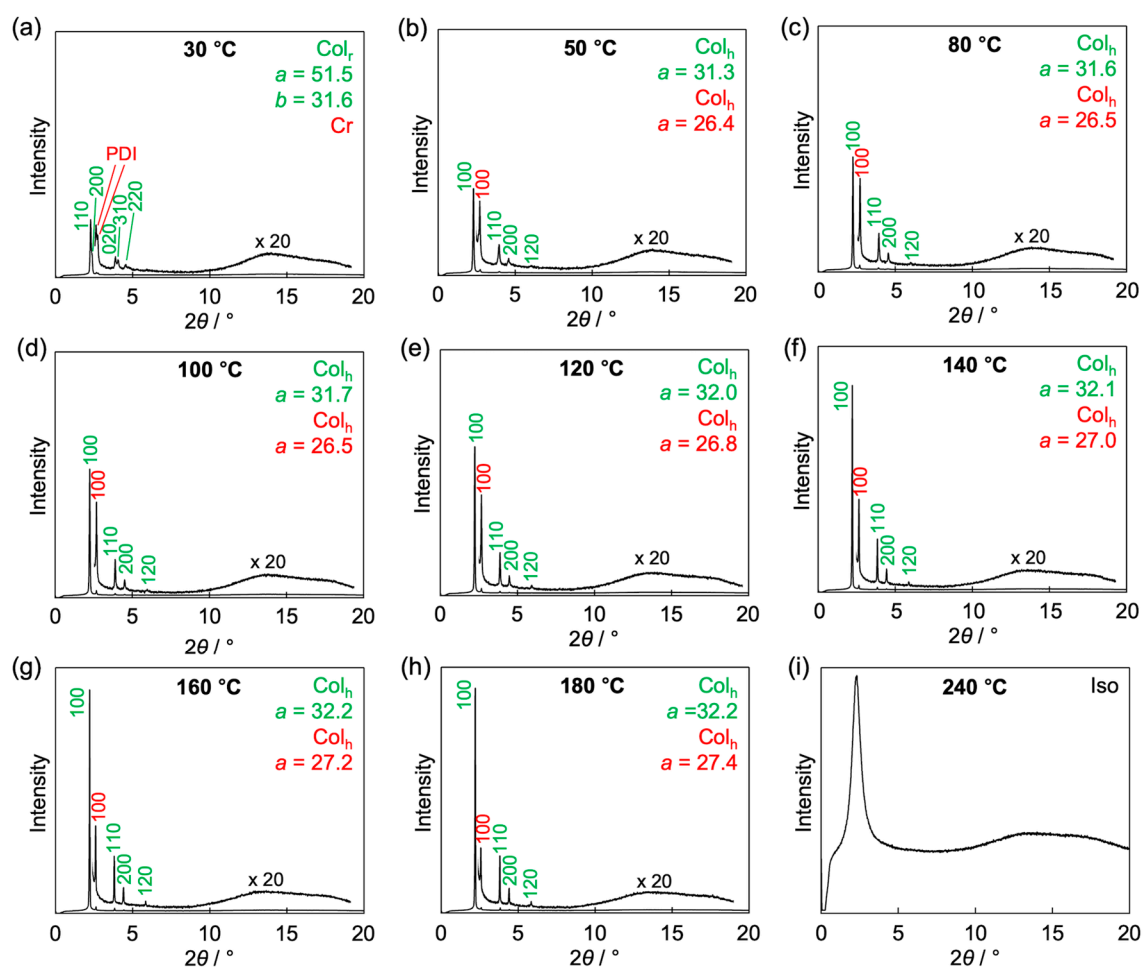

**Figure S6.** Variable-temperature XRD patterns of 1:1 molar ratio mixture of  $\text{H}_2\text{Pc}/\text{PDI}_{\text{TEG/TEG}}$  at (a) 30 °C, (b) 50 °C, (c) 80 °C, (d) 100 °C, (e) 120 °C, (f) 140 °C, (g) 160 °C, (h) 180 °C, and (i) 240 °C on cooling. The phase assignment and cell parameters are represented at the upper right corner of each pattern.

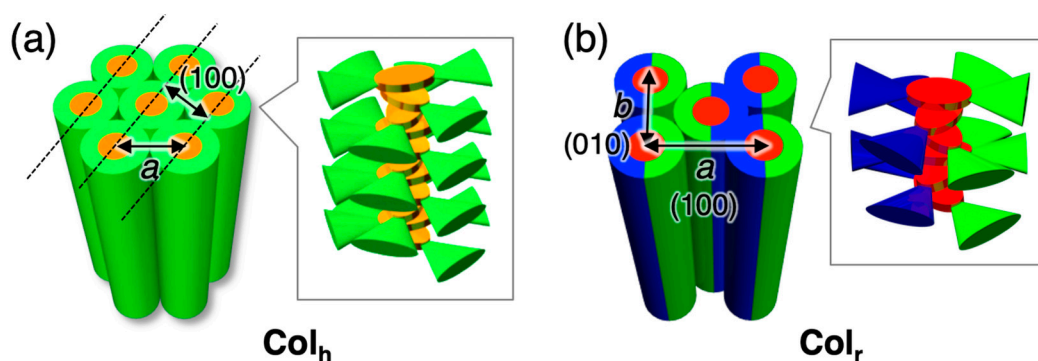

**Figure S7.** Schematic illustrations of (a) columnar hexagonal phase ( $\text{Col}_h$ ) and (b) columnar rectangular phase ( $\text{Col}_r$ ) with corresponding lattice parameters and primary diffractions.

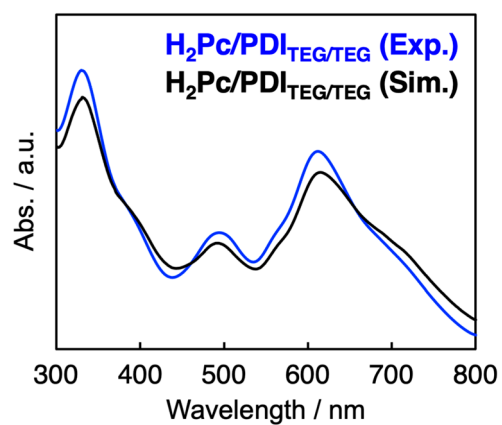

**Figure S8.** Absorption spectra of spin-coated film of  $\text{H}_2\text{Pc}/\text{PDI}_{\text{TEG/TEG}}$  (blue) together with the simulated superimposed spectra constructed from those of  $\text{H}_2\text{Pc}$  and  $\text{PDI}_{\text{TEG/TEG}}$  films (black).
