# Supplementary material for: Side-Chain Labeling Strategy for Forming Self-Sorted Columnar Liquid Crystals from Binary Discotic Systems
Source: MDPI journal article supplement (doi:10.3390/cryst13101473), 2023-10-10
Supplement: s1 [file s1]

Archive with 1 entries (1 files):
- crystals-2605687-supplementary.pdf
